# Supplementary material
Source: PubMed Central journal article supplement (PMC3177061)
Supplement: mmc1.pdf [file mmc1.pdf]

# FOLDING AND HOMODIMERIZATION OF WHEAT GERM AGGLUTININ

María del Carment Portillo-Téllez, Martiniano Bello, Guillermo

Salcedo, Gabriel Gutiérrez, Virginia Gómez-Vidales, and Enrique García-Hernández

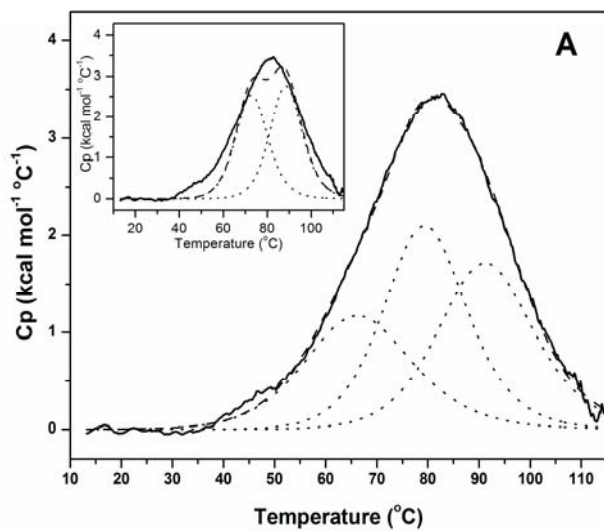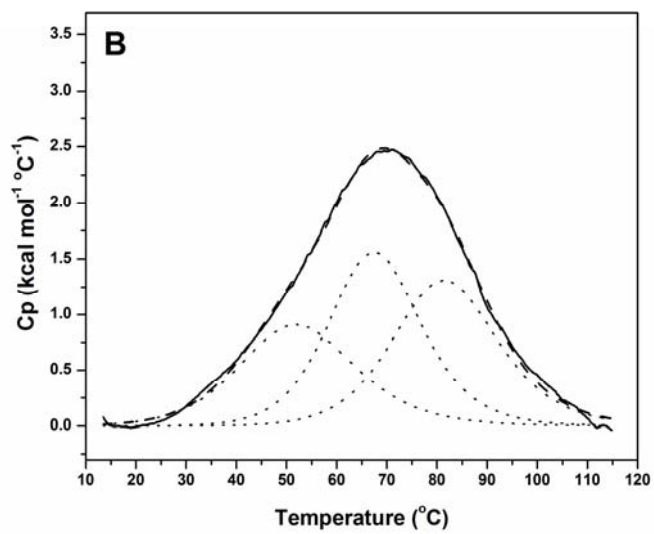

**Fig. S1.** Deconvolution analysis of DSC endotherms of WGA (0.09 mM) at pH 2, 30 mM Gly/HCl, in varying concentrations of GndHCl: **(A)** 0 M and **(B)** 2 M. The best fitting to the calorimetric trace of a model of two independent transitions is shown in the inset of panel **(A)**.

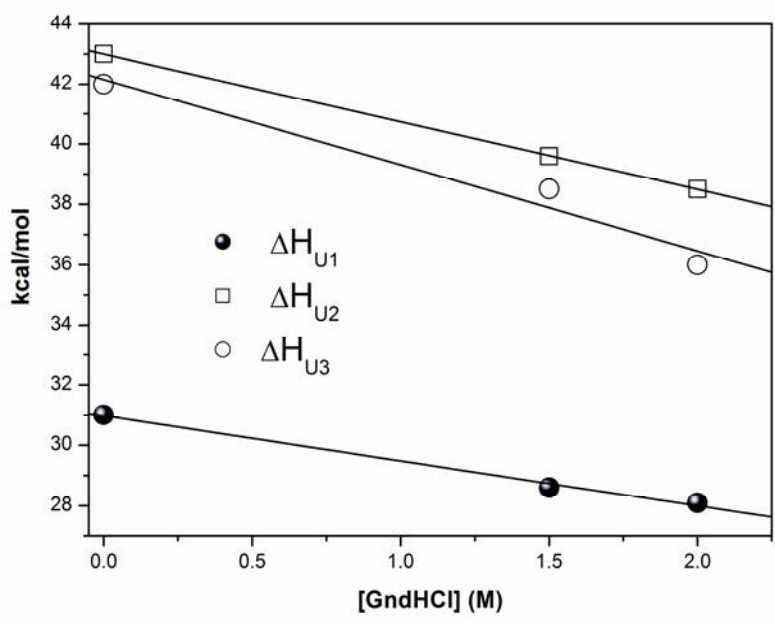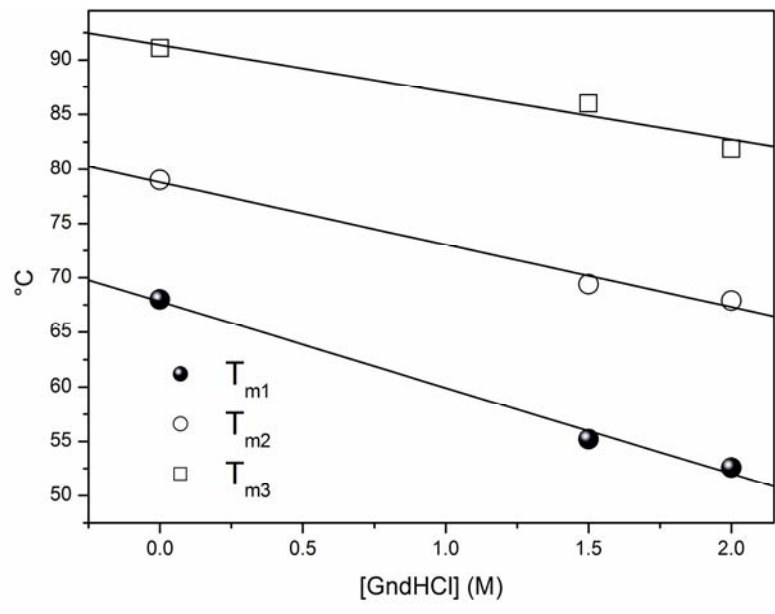

**Fig. S2.** Unfolding enthalpies (upper panel) and melting temperatures (lower panel) as a function of GndHCl concentration for each of the independent transitions exhibited by WGA monomer at pH 2 (Table 1).

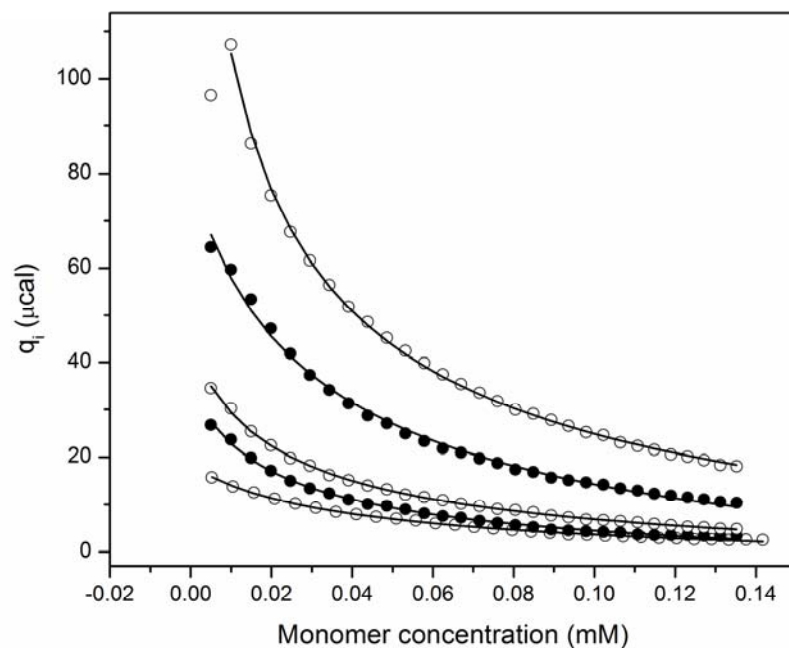

**Fig. S3.** Isothermal dilution calorimetry. Dilution isotherms of WGA at pH 3 (50 mM Gly/HCl, 0.1 M NaCl) as a function of temperature (from bottom to top: 30, 33, 35, 40 and 43 °C). Consecutive 10- $\mu$ l aliquots of 0.7-0.9 mM protein solution were diluted into 1.44 mL of buffer solution. Typically, a total of 30 injections were applied. The solid lines represent the best-fitting curves of a dimer dissociation model (equations 2-3).

**Table S1.** Independent vs. sequential unfolding parameters for the unfolding transitions exhibited by WGA monomer at pH 2, as determined by DSC

|                                | <b>1</b>       | <b>2</b>       | <b>3</b>       |
|--------------------------------|----------------|----------------|----------------|
| <b>Independent transitions</b> |                |                |                |
| $T_m$ (°C)                     | $68.0 \pm 0.7$ | $79.0 \pm 0.6$ | $91.1 \pm 0.4$ |
| $\Delta H_U$ (kcal/mol)        | $31 \pm 2$     | $43 \pm 3$     | $42 \pm 1$     |
| <b>Sequential transitions</b>  |                |                |                |
| $T_m$ (°C)                     | $66.3 \pm 0.1$ | $79.6 \pm 0.1$ | $92.5 \pm 0.1$ |
| $\Delta H_U$ (kcal/mol)        | $34 \pm 2$     | $44 \pm 2$     | $43 \pm 1$     |
